# Supplementary material for: Fe3O4@PVIM@Zn(ii) magnetic microspheres for luteolin recognition via combined reflux-precipitation polymerization and metal-ion affinity strategy
Source: Royal Society of Chemistry journal article supplement (doi:10.1039/c6nj03868a), 2017-01-01
Supplement: c6nj03868a1.pdf [file c6nj03868a1.pdf]

## Supporting Information

### **Fe<sub>3</sub>O<sub>4</sub>@PVIM@Zn(II) Magnetic Microspheres for Luteolin Recognition via Combined Reflux-precipitation Polymerization and Metal-ion Affinity Strategy**

Qiang Jia<sup>a, b</sup>, Yinxian Peng<sup>\*, a</sup>, Jianming Pan<sup>b, \*</sup>, Xiaobin Huang<sup>a</sup>, Xiangheng Niu<sup>b</sup>, Tao  
Zhang<sup>b</sup>

<sup>a</sup> School of Environmental and Chemical Engineering, Jiangsu University of Science  
and Technology, Zhenjiang, Jiangsu 212003, China.

<sup>b</sup> School of Chemistry and Chemical Engineering, Jiangsu University, Zhenjiang  
212013, China.

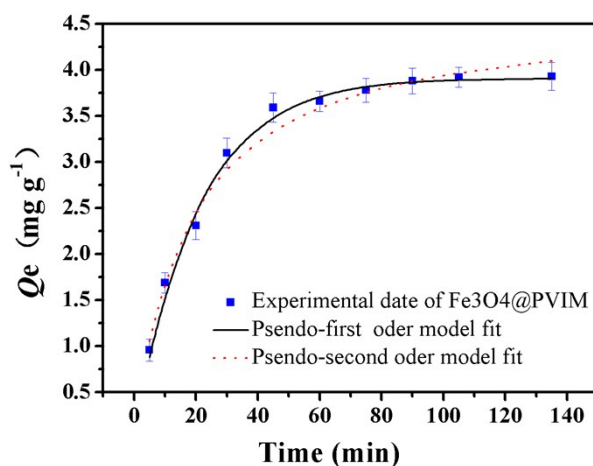

Fig. S1. Kinetic data and modeling for the adsorption of LTL onto Fe<sub>3</sub>O<sub>4</sub>@

---

\* Corresponding author. Tel.: +086 88791708; fax: +086 88791800.

E-mail: pyxhx@just.edu.cn (Y.X. Peng); zhenjiangpjm@126.com (J.M. Pan)

PVIM.

Table S1 Kinetic model parameters obtained in adsorption of LTL onto  $\text{Fe}_3\text{O}_4@\text{PVIM}$ .

| $Q_{e,e}$<br>(mg g <sup>-1</sup> ) | Pseudo-first-order              |                                    |       | Pseudo-second-order                              |                                    |                                   |                                                |       |
|------------------------------------|---------------------------------|------------------------------------|-------|--------------------------------------------------|------------------------------------|-----------------------------------|------------------------------------------------|-------|
|                                    | $k_1$<br>(L min <sup>-1</sup> ) | $Q_{e,c}$<br>(mg g <sup>-1</sup> ) | $R^2$ | $k_2$<br>(g mg <sup>-1</sup> min <sup>-1</sup> ) | $Q_{e,c}$<br>(mg g <sup>-1</sup> ) | $t_{1/2}$<br>(min <sup>-1</sup> ) | $h$<br>(mg g <sup>-1</sup> min <sup>-1</sup> ) | $R^2$ |
| 3.93                               | 0.051                           | 3.908                              | 0.991 | 0.012                                            | 4.605                              | 18.096                            | 0.275                                          | 0.982 |
